# Supplementary material for: Evaluation of Renal Function after Partial Nephrectomy and Detection of Clinically Significant Acute Kidney Injury
Source: MDPI journal article supplement (doi:10.3390/medicina58050667), 2022-05-17
Supplement: s1 [file s1]

**Table S1.** Study patients perioperative, intraoperative and postoperative laboratory data.

| Variable                                           | Value                            | AKI (CKD upstage) | AKI (CKD non-upstage) | Non-AKI     | p - value (Fisher's) |
|----------------------------------------------------|----------------------------------|-------------------|-----------------------|-------------|----------------------|
| Preoperative eGFR<br>ml/min/1.73 m <sup>2</sup>    | Median (IQR)                     | 72.0 (22.0)       | 87.0 (12.8)           | 93.0 (11.0) | <0.001               |
| Preoperative eGFR categories                       | Normal or high                   | 6 (28.6)          | 5 (27.8)              | 31 (59.6)   | 0.014                |
|                                                    | Mildly decreased                 | 15 (71.4)         | 13 (72.2)             | 21 (40.4)   |                      |
| Preoperative uACR<br>mg/mmol                       | Median (IQR)                     | 2.5 (0.9)         | 0.8 (2.2)             | 1.3 (1.2)   | 0.038                |
| NLR after 48 h                                     | Median (IQR)                     | 4.5 (2.7)         | 9.6 (6.9)             | 3.3 (1.3)   | <0.001               |
| NLR after 48 h, categories                         | Normal                           | 2 (9.5)           | 2 (11.1)              | 34 (65.4)   | <0.001               |
|                                                    | Increased                        | 17 (81.0)         | 8 (44.4)              | 18 (34.6)   |                      |
|                                                    | Severely increased               | 2 (9.5)           | 8 (44.4)              |             |                      |
| sCr after 48 h, µmol/l                             | Median (IQR)                     | 107.0 (22.0)      | 106.5 (33.0)          | 79.0 (14.0) | <0.001               |
| eGFR after 48 h, ml/min/1.73 m <sup>2</sup>        | Median (IQR)                     | 51.0 (15.0)       | 56.0 (22.0)           | 83.0 (20.0) | <0.001               |
| eGFR after 48 h, categories                        | Normal or high                   |                   |                       | 22 (42.3)   | <0.001               |
|                                                    | Mildly decreased                 | 5 (23.8)          | 7 (38.9)              | 28 (53.8)   |                      |
|                                                    | Mildly to moderately decreased   | 10 (47.6)         | 9 (50.0)              | 2 (3.8)     |                      |
|                                                    | Moderately to severely decreased | 5 (23.8)          | 2 (11.1)              |             |                      |
|                                                    | Severely decreased               | 1 (4.8)           |                       |             |                      |
| NLR after 2 months                                 | Median (IQR)                     | 1.8 (0.5)         | 1.8 (1.2)             | 1.7 (0.6)   | 0.672                |
| sCr after 2 months, µmol/l                         | Median (IQR)                     | 95.0 (23.0)       | 89.0 (23.5)           | 77.0 (13.5) | <0.001               |
| eGFR after 2 months,<br>ml/min/1.73 m <sup>2</sup> | Median (IQR)                     | 57.0 (16.0)       | 76.5 (12.5)           | 87.0 (14.8) | <0.001               |
| eGFR after 2 months,<br>categories                 | Mildly decreased                 | 8 (38.1)          | 15 (83.3)             | 30 (57.7)   | <0.001               |

|                                                 |                                  |             |             |             |        |
|-------------------------------------------------|----------------------------------|-------------|-------------|-------------|--------|
|                                                 | Normal or high                   |             | 3 (16.7)    | 22 (42.3)   |        |
|                                                 | Mildly to moderately decreased   | 12 (57.1)   |             |             |        |
|                                                 | Moderately to severely decreased | 1 (4.8)     |             |             |        |
| sCr after 6 months, $\mu\text{mol/l}$           | Median (IQR)                     | 96.0 (20.0) | 83.5 (16.5) | 75.5 (16.0) | <0.001 |
| eGFR after 6 months, ml/min/1.73 m <sup>2</sup> | Median (IQR)                     | 58.0 (19.0) | 75.5 (19.0) | 86.0 (16.0) | <0.001 |
| eGFR categories after 6 months                  | Normal or high                   |             | 5 (27.8)    | 20 (38.5)   | <0.001 |
|                                                 | Mildly decreased                 | 7 (33.3)    | 13 (72.2)   | 32 (61.5)   |        |
|                                                 | Mildly to moderately decreased   | 14 (66.7)   |             |             |        |
| sCr after 12 months, $\mu\text{mol/l}$          | Median (IQR)                     | 97.0 (22.0) | 79.0 (15.2) | 74.0 (20.0) | <0.001 |
| eGFR after 12 months, ml/min                    | Median (IQR)                     | 58.0 (18.0) | 78.5 (22.2) | 86.5 (17.5) | <0.001 |
| eGFR categories after 12 months                 | Mildly decreased                 | 6 (28.6)    | 13 (72.2)   | 30 (57.7)   | <0.001 |
|                                                 | Normal or high                   |             | 5 (27.8)    | 22 (42.3)   |        |
|                                                 | Mildly to moderately decreased   | 14 (66.7)   |             |             |        |
|                                                 | Moderately to severely decreased | 1 (4.8)     |             |             |        |
| uACR after 12 months, mg/mmol                   | Median (IQR)                     | 4.9 (3.7)   | 2.0 (3.4)   | 1.8 (1.8)   | 0.007  |

Abbreviations: IQR – interquartile range; eGFR – estimated glomerular filtration rate; uACR – urine albumin-creatinine ratio; NLR - neutrophil to lymphocyte ratio; sCr – serum creatinine. *p*-values calculated for comparison of non-AKI, AKI without CKD upstage and AKI with CKD upstage cohorts.
